# Supplementary material for: Prediction of gene-phenotype associations in humans, mice, and plants using phenologs
Source: Springer Nature journal article supplement (doi:10.1186/1471-2105-14-203), 2013-06-21
Supplement: 12859_2012_5966_MOESM2_ESM.pdf [file 12859_2012_5966_MOESM2_ESM.pdf]

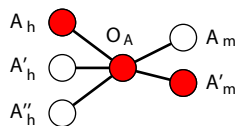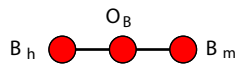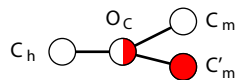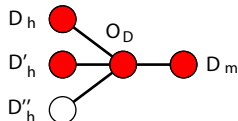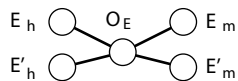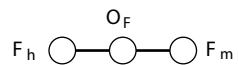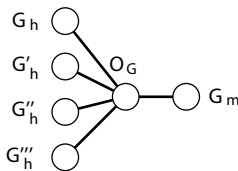

(a) Orthogroups

|          | $\varphi_h$ | $\varphi_m$ |
|----------|-------------|-------------|
| $A_h$    | •           | •           |
| $A'_h$   |             | •           |
| $A''_h$  |             | •           |
| $B_h$    | •           | •           |
| $C_h$    |             | •           |
| $D_h$    | •           | •           |
| $D'_h$   | •           | •           |
| $D''_h$  |             | •           |
| $E_h$    |             |             |
| $E'_h$   |             |             |
| $F_h$    |             |             |
| $G_h$    |             |             |
| $G'_h$   |             |             |
| $G''_h$  |             |             |
| $G'''_h$ |             |             |
| $\vdots$ |             |             |

(b) By human gene

|          | $\varphi_m$ | $\varphi_h$ |
|----------|-------------|-------------|
| $A_m$    |             | •           |
| $A'_m$   | •           | •           |
| $B_m$    | •           | •           |
| $C_m$    | •           |             |
| $C'_m$   |             |             |
| $D_m$    | •           | •           |
| $E_m$    |             |             |
| $E'_m$   |             |             |
| $F_m$    |             |             |
| $G_m$    |             |             |
| $\vdots$ |             |             |

(c) By mouse gene

|          | $\varphi_h$ | $\varphi_m$ |
|----------|-------------|-------------|
| A        | •           | •           |
| B        | •           | •           |
| C        |             | •           |
| D        | •           | •           |
| E        |             |             |
| F        |             |             |
| G        |             |             |
| $\vdots$ |             |             |

(d) By orthogroup
