# Supplementary figures and images for: Prediction of gene-phenotype associations in humans, mice, and plants using phenologs
Source: Springer Nature journal article supplement (doi:10.1186/1471-2105-14-203), 2013-06-21

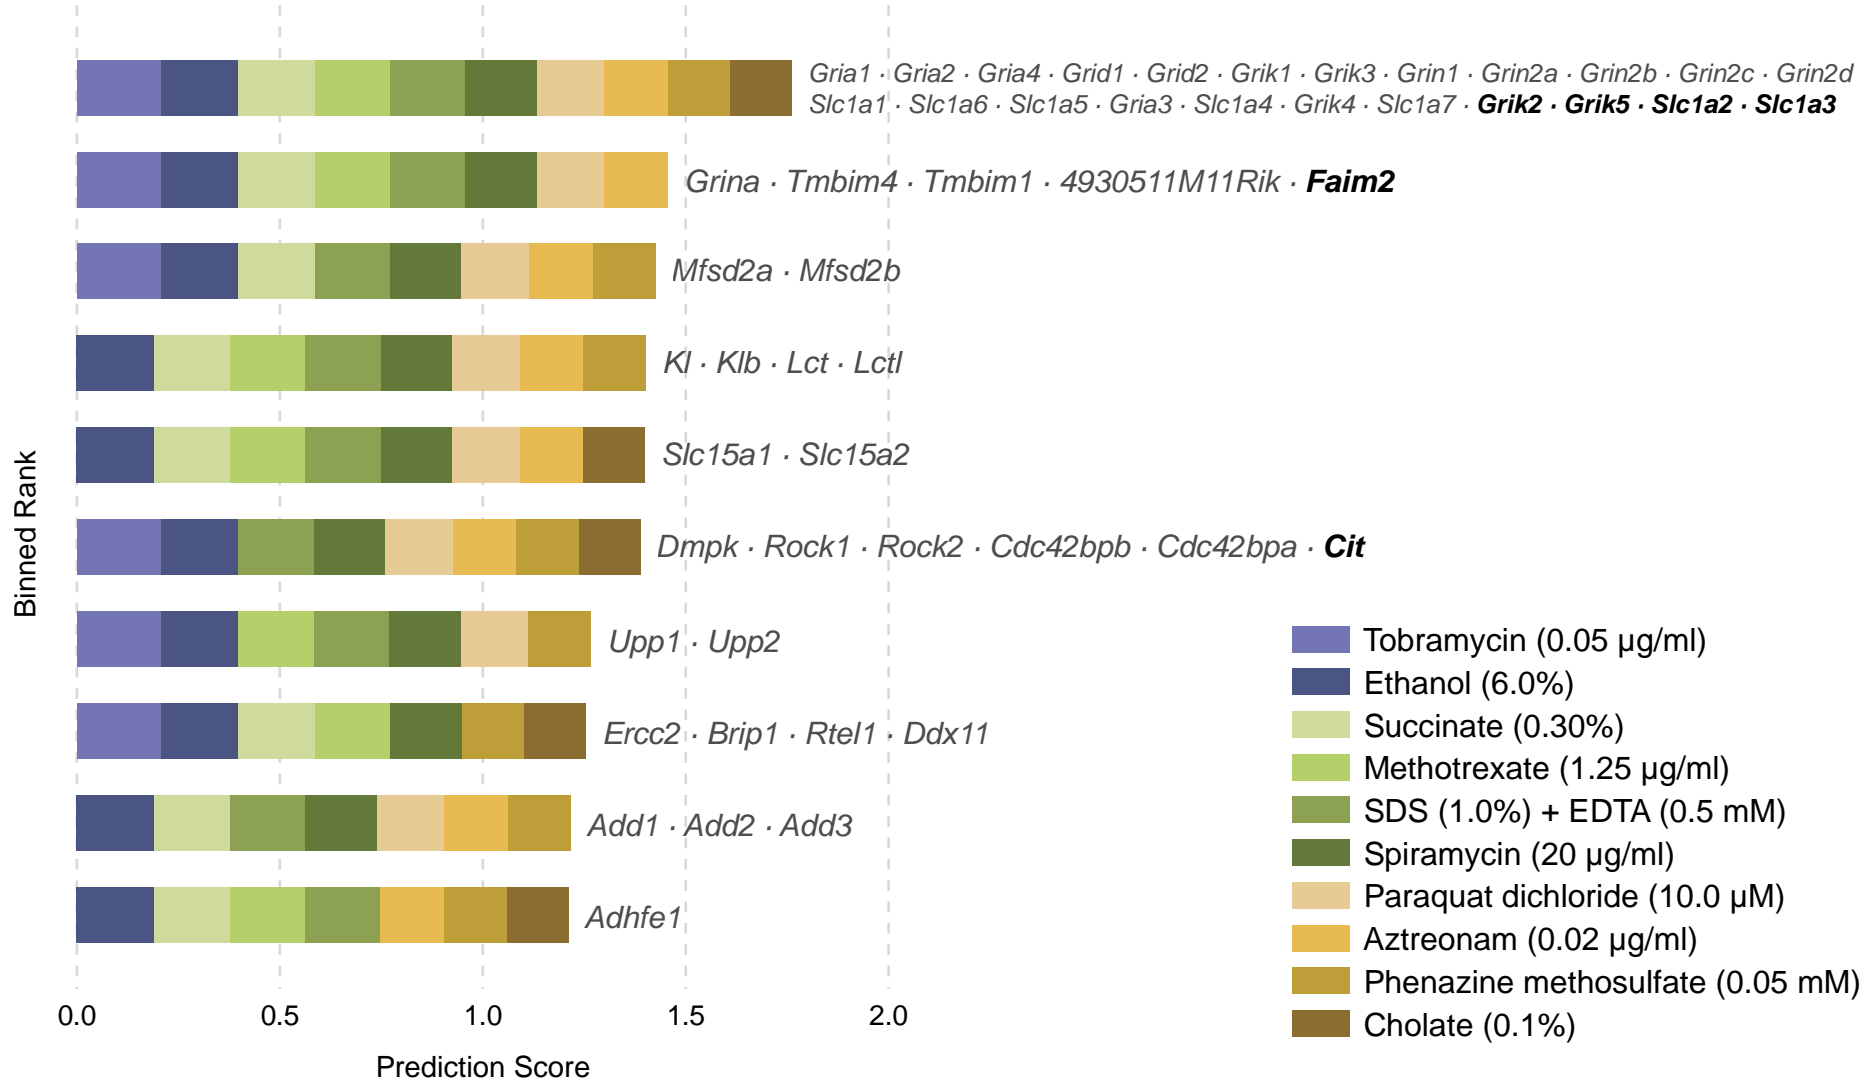

Supplement: 12859_2012_5966_MOESM10_ESM.pdf [file 12859_2012_5966_MOESM10_ESM.pdf]

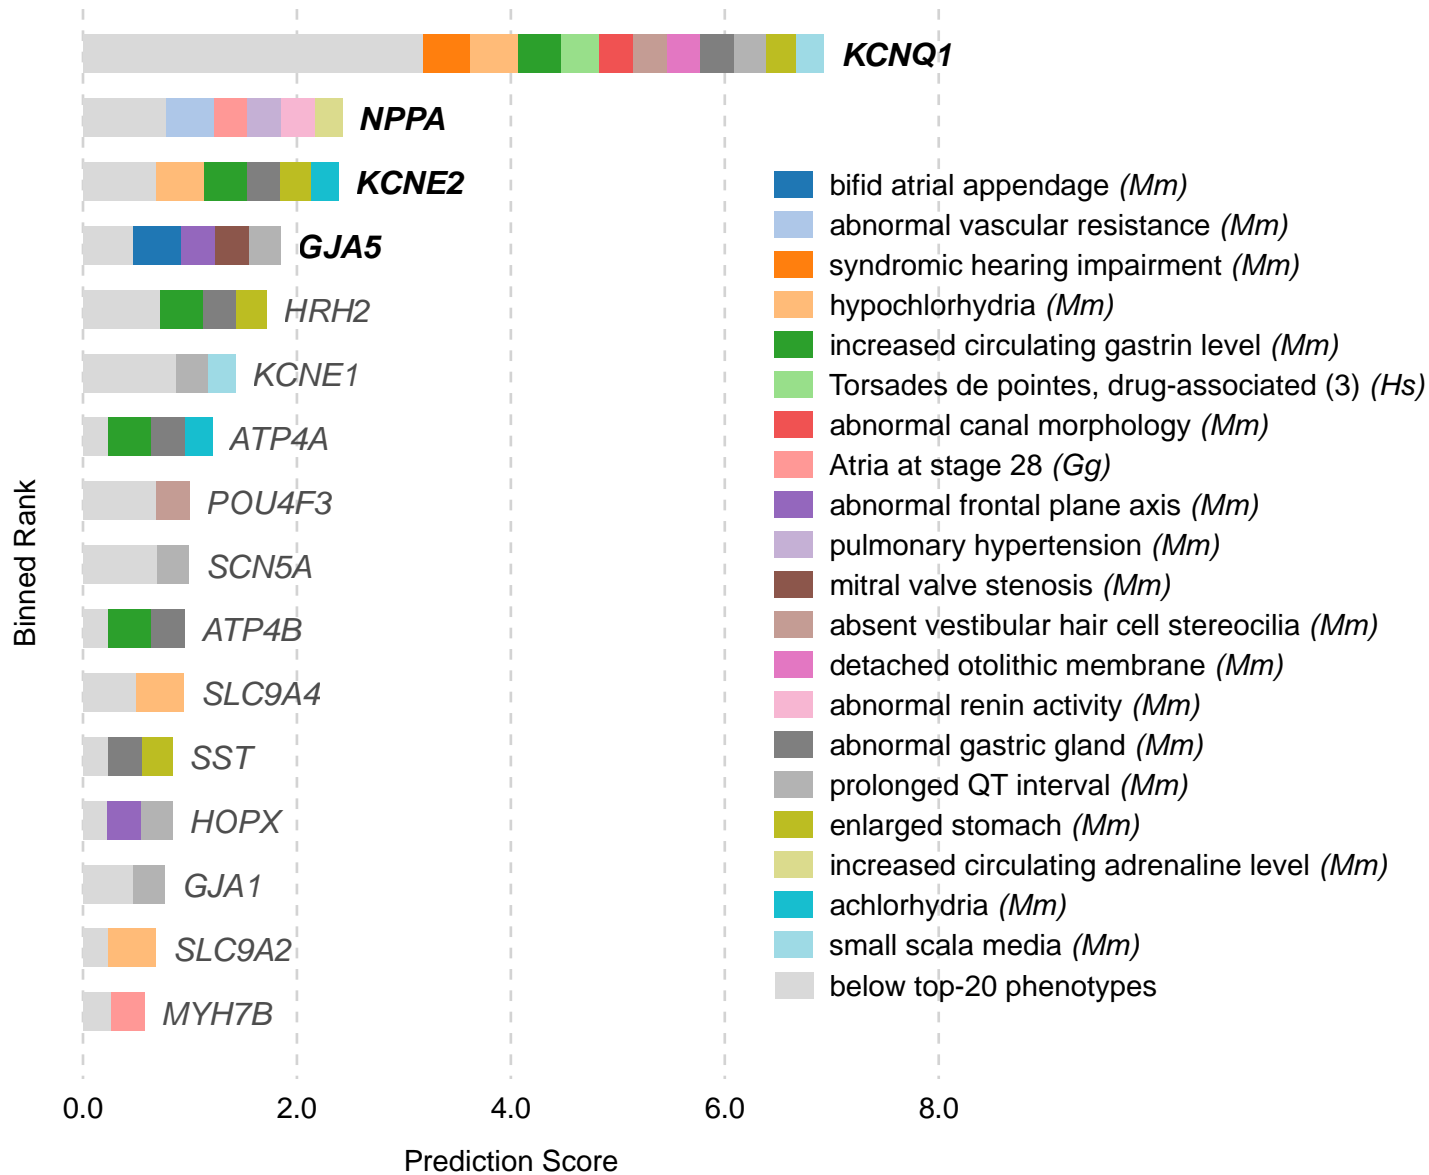

Supplement: 12859_2012_5966_MOESM11_ESM.pdf [file 12859_2012_5966_MOESM11_ESM.pdf]

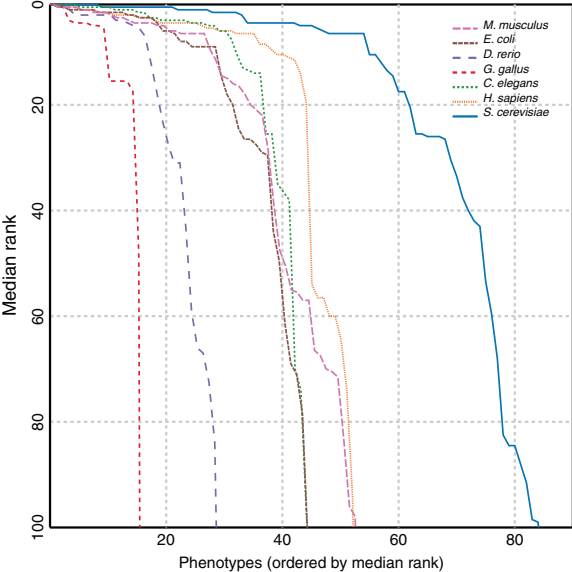

Supplement: 12859_2012_5966_MOESM12_ESM.pdf [file 12859_2012_5966_MOESM12_ESM.pdf]

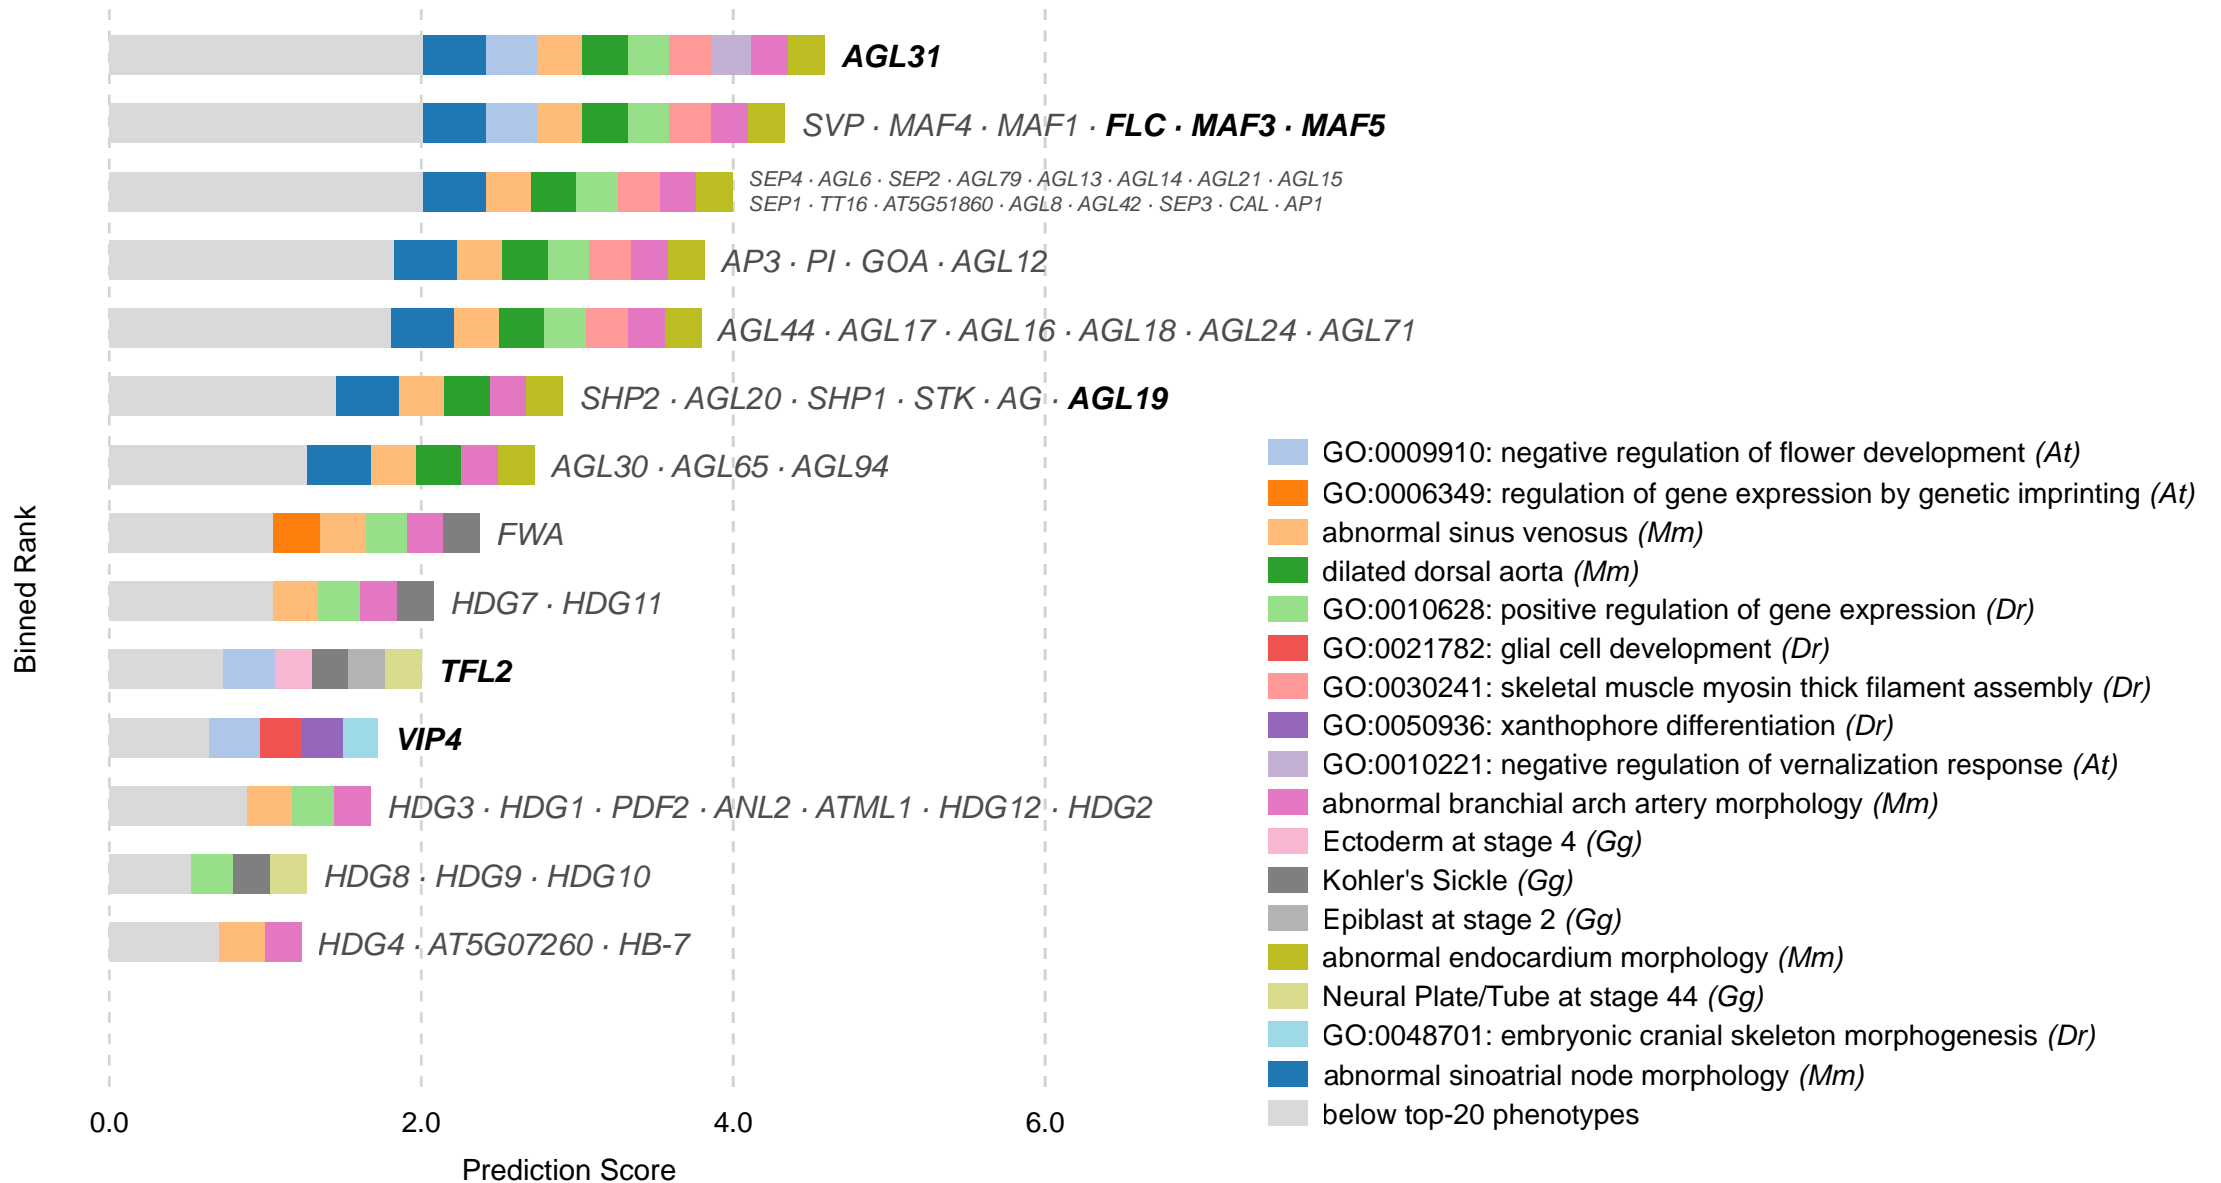

Supplement: 12859_2012_5966_MOESM13_ESM.pdf [file 12859_2012_5966_MOESM13_ESM.pdf]

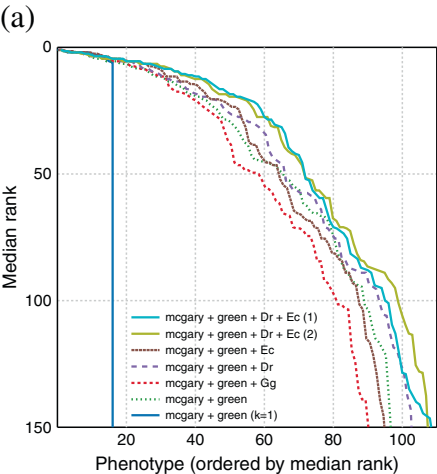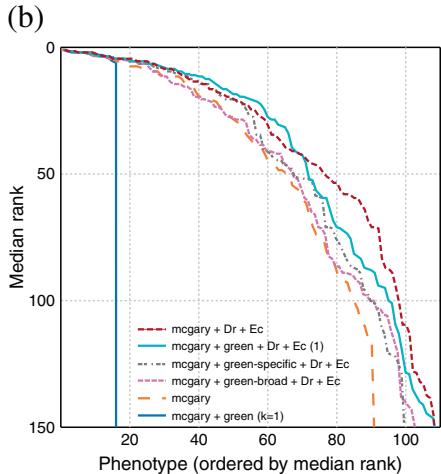

Supplement: 12859_2012_5966_MOESM14_ESM.pdf [file 12859_2012_5966_MOESM14_ESM.pdf]

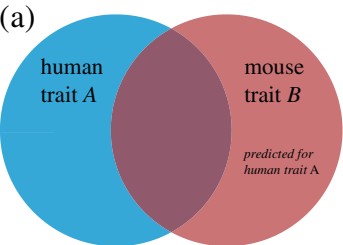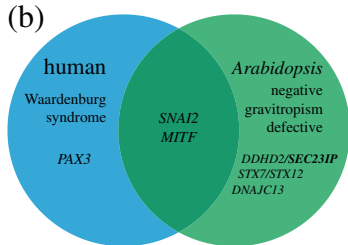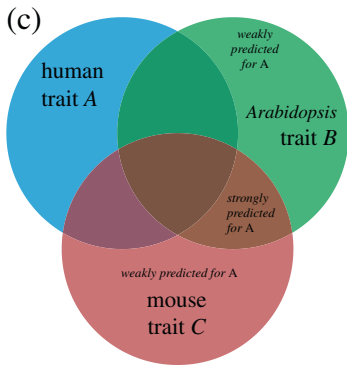

Supplement: 12859_2012_5966_MOESM1_ESM.pdf [file 12859_2012_5966_MOESM1_ESM.pdf]

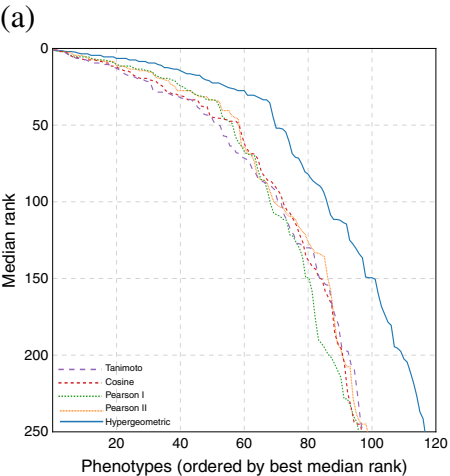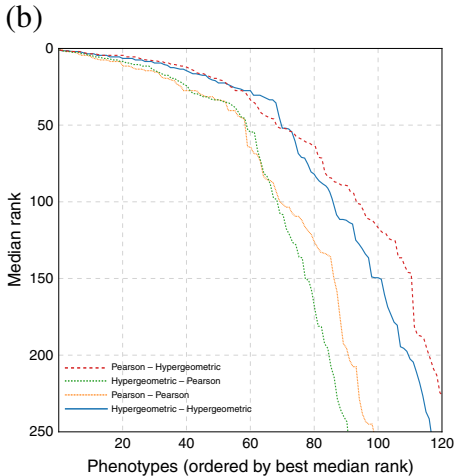

Supplement: 12859_2012_5966_MOESM3_ESM.pdf [file 12859_2012_5966_MOESM3_ESM.pdf]

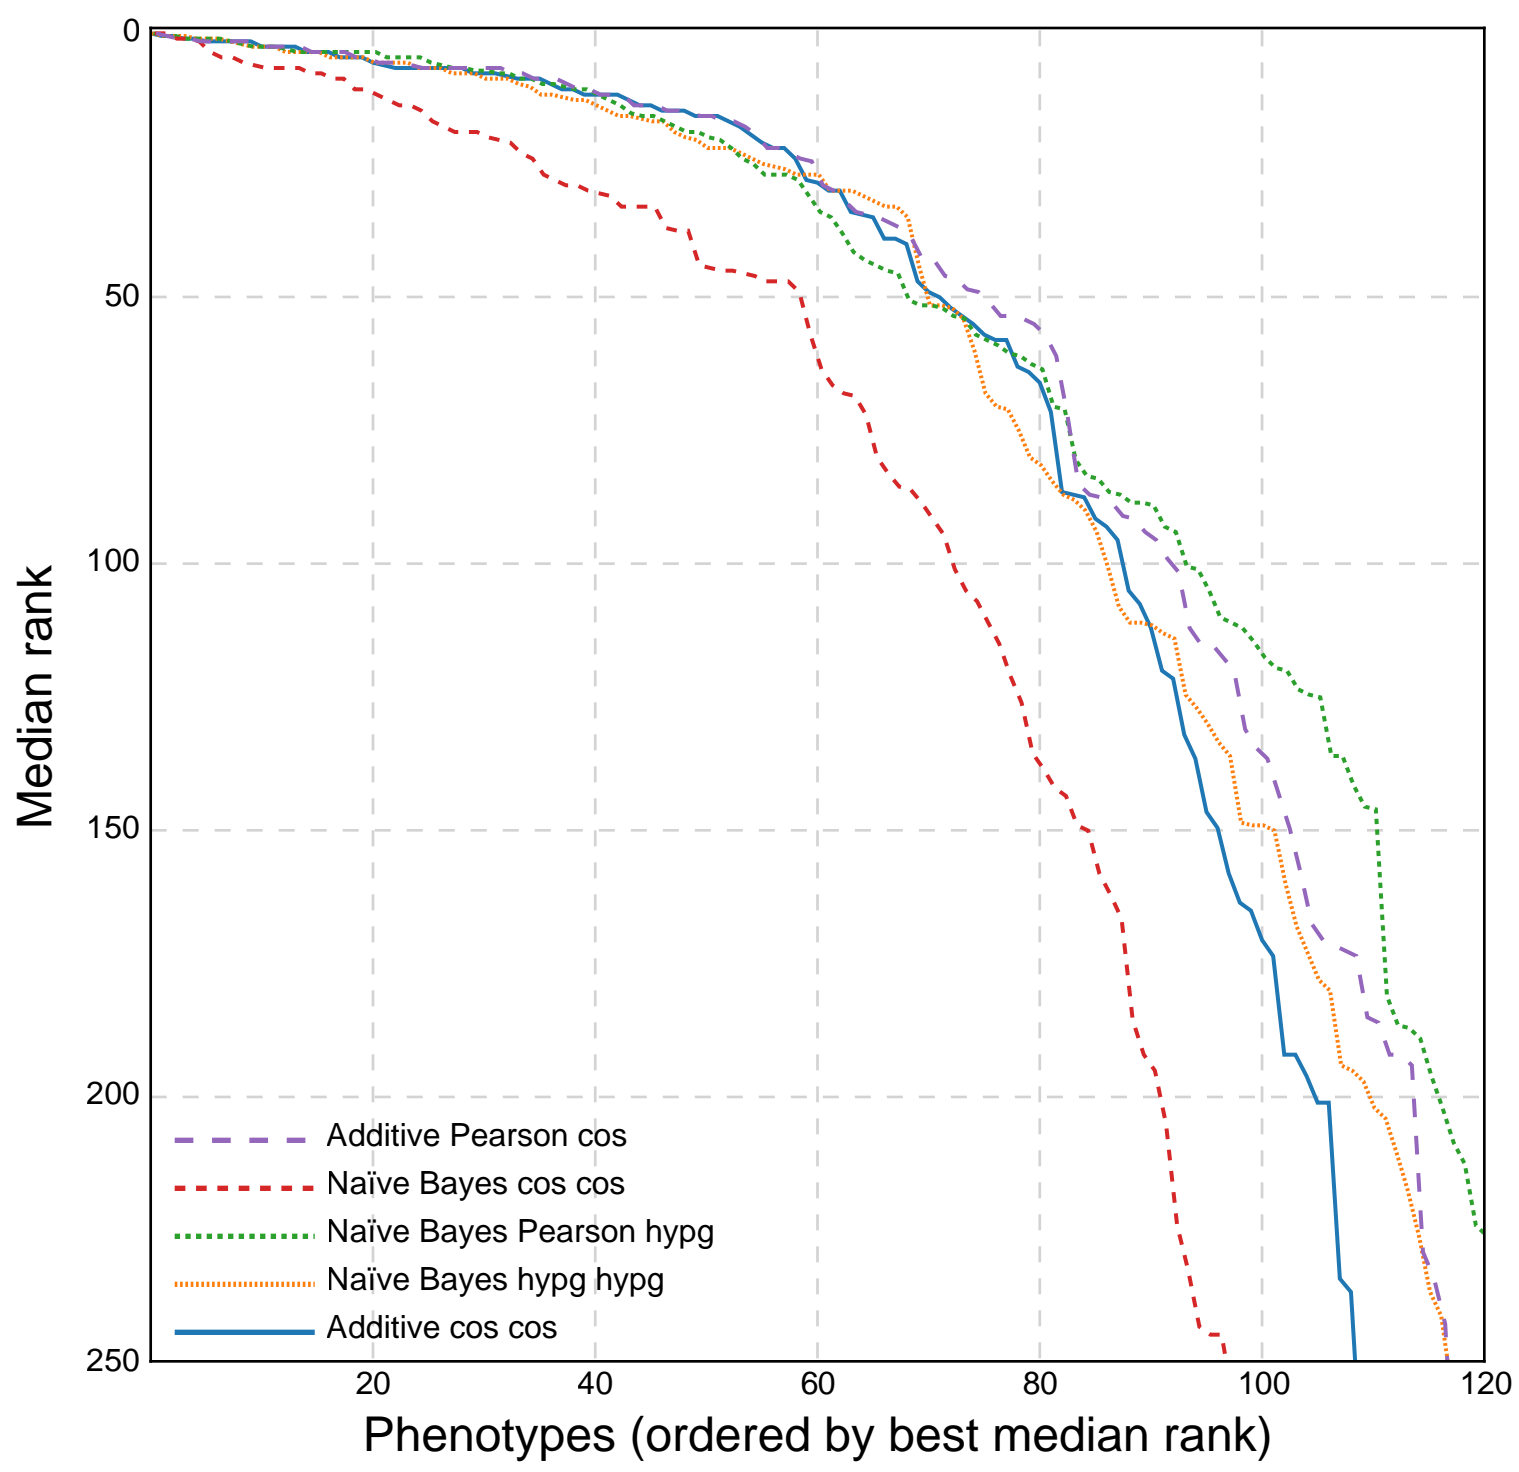

Supplement: 12859_2012_5966_MOESM4_ESM.pdf [file 12859_2012_5966_MOESM4_ESM.pdf]

Median rank

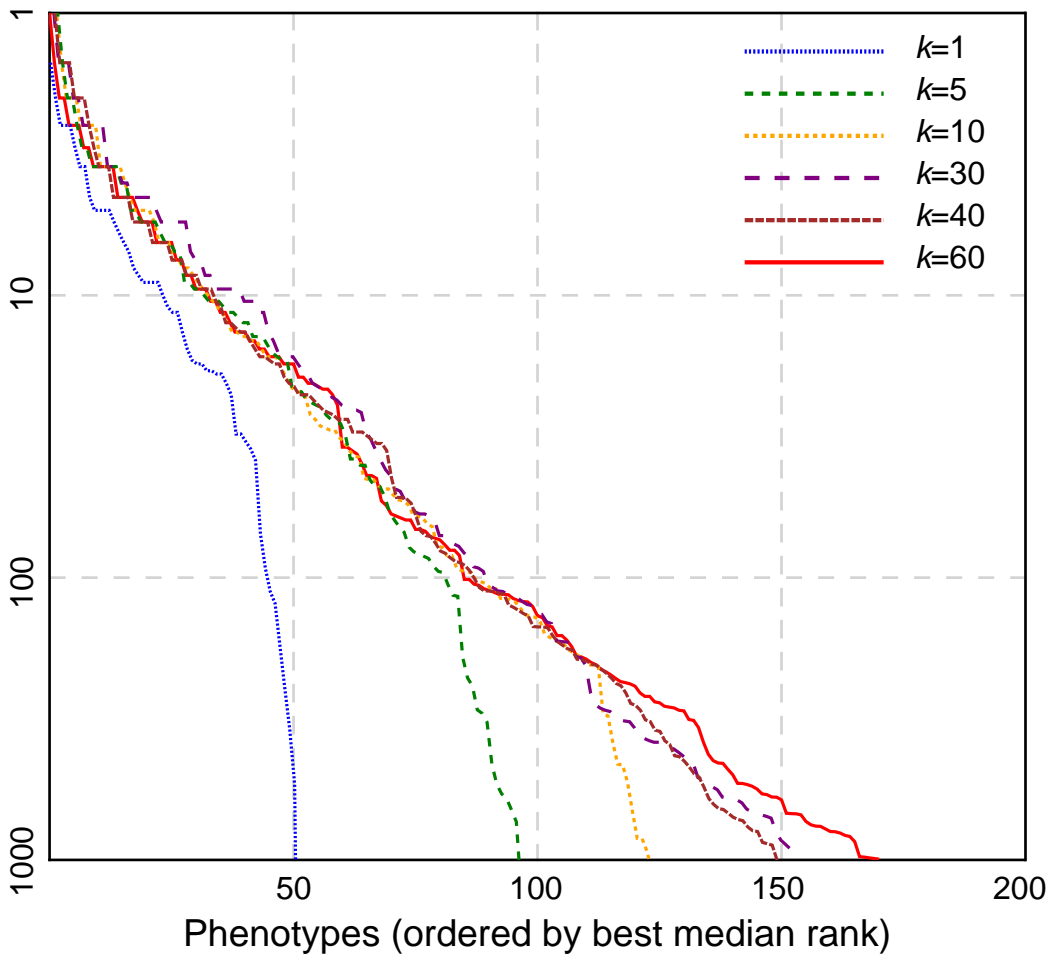

Phenotypes (ordered by best median rank)

Supplement: 12859_2012_5966_MOESM5_ESM.pdf [file 12859_2012_5966_MOESM5_ESM.pdf]

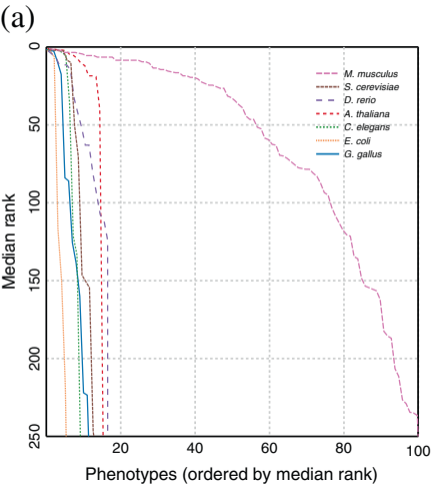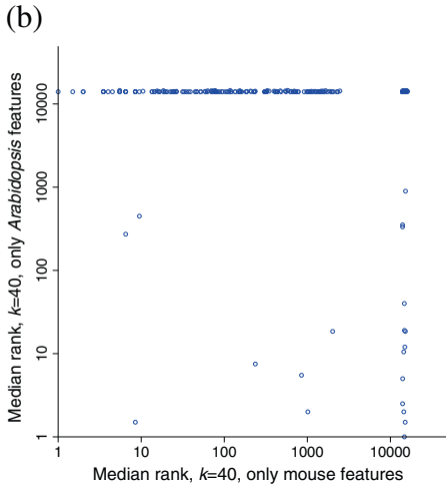

Supplement: 12859_2012_5966_MOESM6_ESM.pdf [file 12859_2012_5966_MOESM6_ESM.pdf]

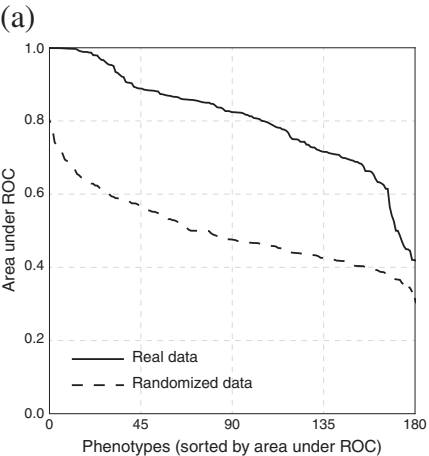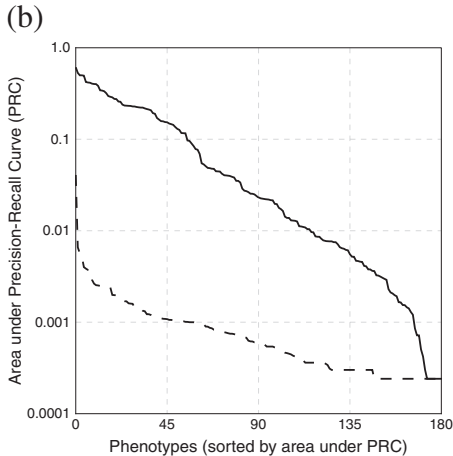

Supplement: 12859_2012_5966_MOESM7_ESM.pdf [file 12859_2012_5966_MOESM7_ESM.pdf]

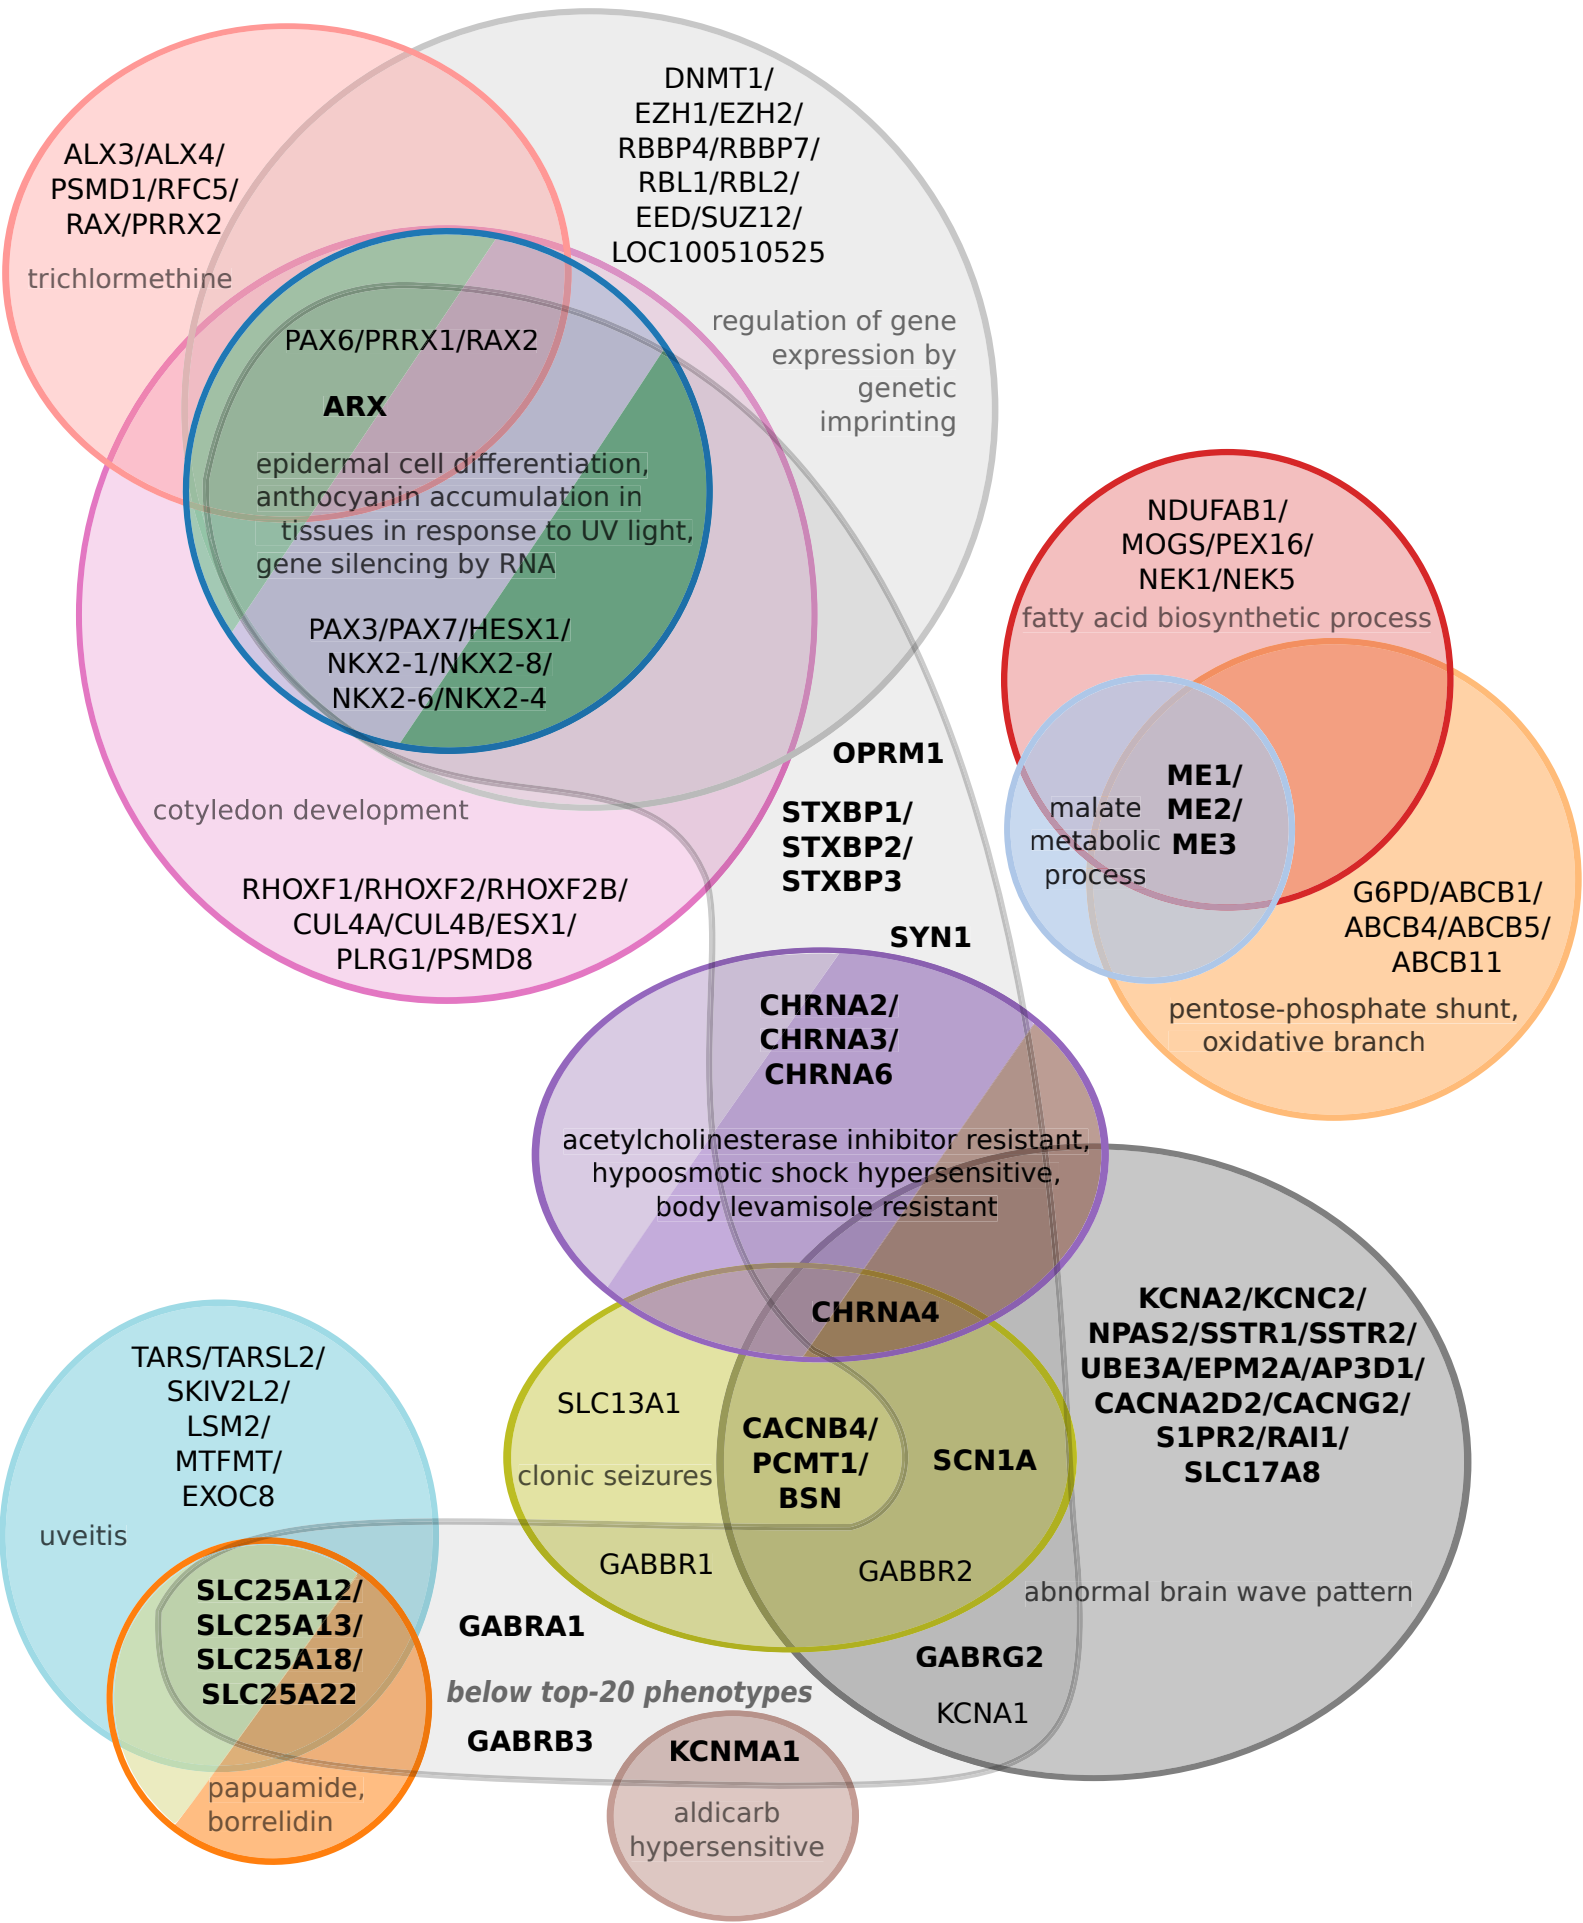

Supplement: 12859_2012_5966_MOESM8_ESM.pdf [file 12859_2012_5966_MOESM8_ESM.pdf]

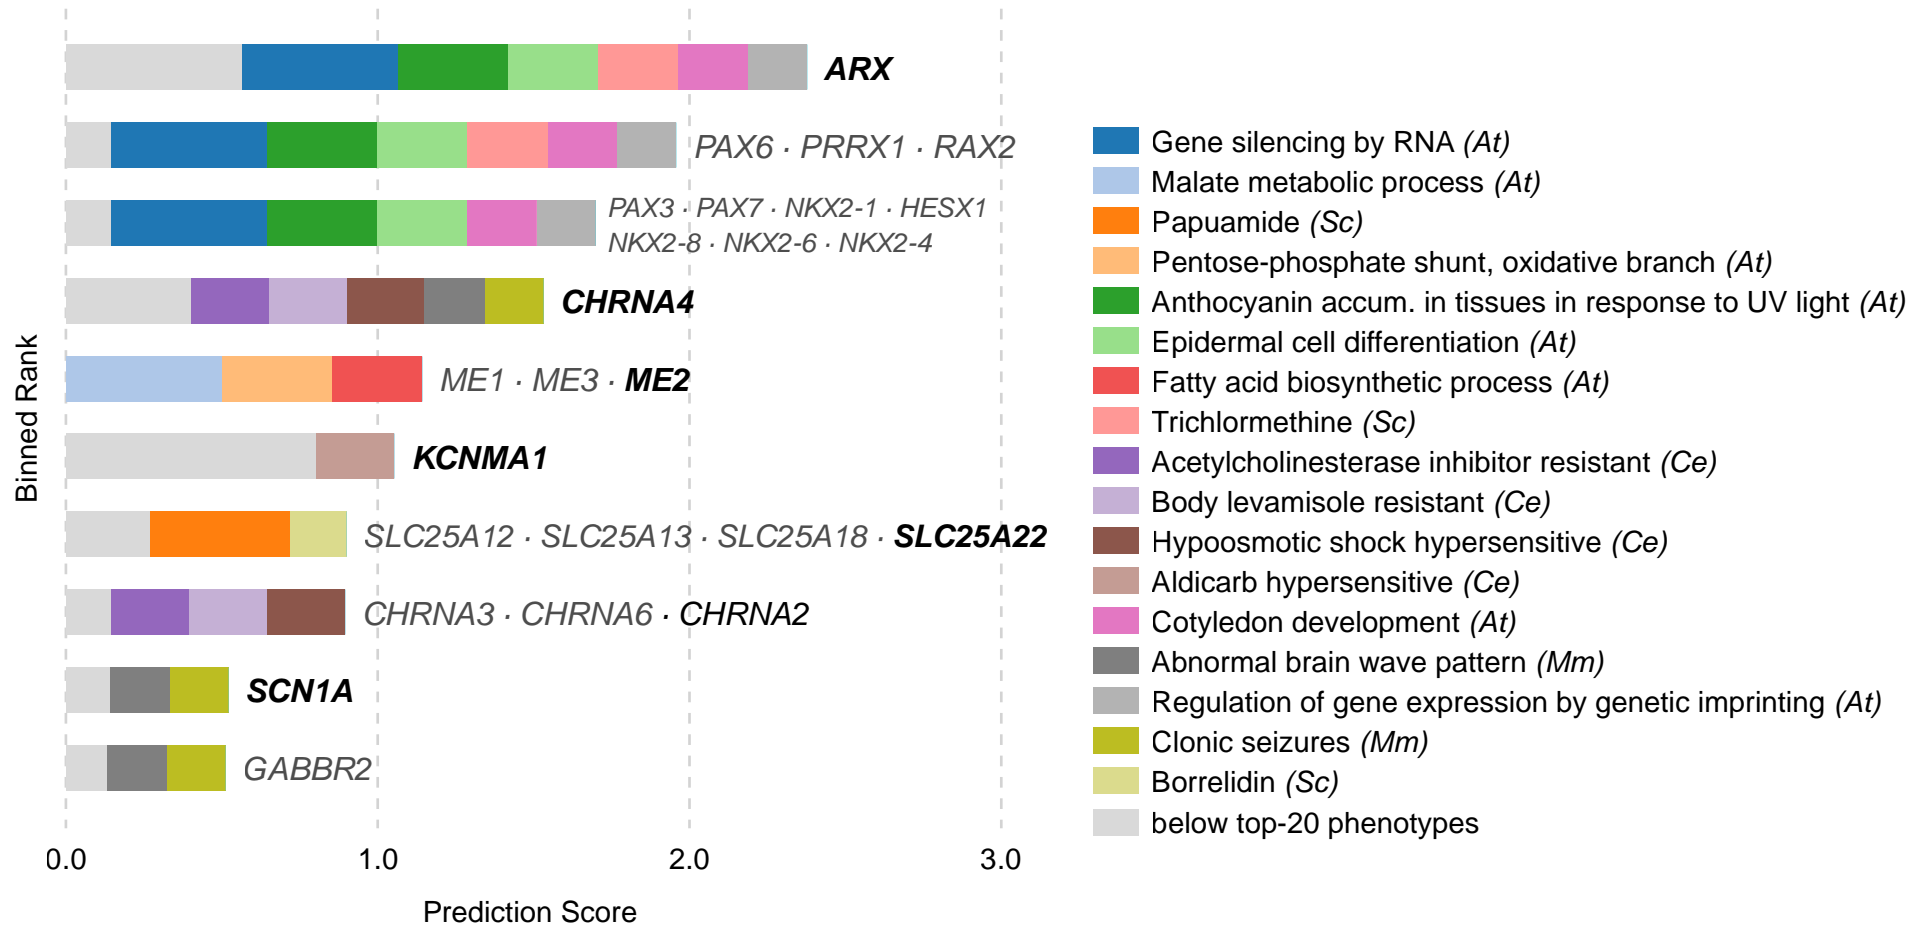

Supplement: 12859_2012_5966_MOESM9_ESM.pdf [file 12859_2012_5966_MOESM9_ESM.pdf]
